# Supplementary material
Source: PubMed Central journal article supplement (PMC3423459)
Supplement: supp_47.2.178_Schroeder_ODS.pdf [file supp_47.2.178_Schroeder_ODS.pdf]

## **AGR2 is induced in asthma and promotes allergen-induced mucin overproduction**

Bradley W. Schroeder, MD, PhD, Catherine Verhaeghe, PhD, Sung-Woo Park, MD, PhD, Louis T. Nguyenvu, MBA, Xiaozhu Huang, MD, Guohua Zhen, MD, PhD, and David J. Erle, MD

**ONLINE DATA SUPPLEMENT**

## **METHODS**

### **Antibodies and antisera**

Antibodies used were anti-human AGR2 (EPR3278, Epitomics); anti-mouse AGR2 (Ab22208, Abcam); anti-GRP78/GRP94 (AB12223, Abcam); anti-MUC5AC monoclonal antibodies 19M1, 21M1, 62M1, 166M1 (all generously provided by Dr. Jacques Bara, INSERM, France (1, 2)), CLH2 (Millipore), 1-13M1 (Thermo Scientific), and 45M1 (Santa Cruz Biotechnology); anti-MUC5B rabbit antiserum (kindly provided by Dr. C. William Davis, University of North Carolina) (3); anti-MUC5B (H300, Santa Cruz Biotechnology); anti-Giantin (AB24586, Abcam). Normal rabbit IgG (Santa Cruz Biotechnology) and normal mouse IgG (Invitrogen) were used as controls.

### **Immunofluorescence**

5  $\mu$ m sections of paraformaldehyde-fixed, paraffin-embedded lung were deparaffinized, hydrated, microwaved, incubated in 100 mM glycine, and washed in Tris-buffered saline (TBS) with 0.05% Tween-20. After blocking in 10% normal goat serum plus 2% bovine serum albumin (BSA), sections were incubated with primary antibodies diluted in 2% BSA/TBST, washed, incubated with secondary antibodies, washed, treated with Sudan black (4) and washed in TBS prior to mounting. 4',6-diamidino-2-phenylindole (DAPI, 1  $\mu$ g/ml) was included in the secondary antibody solution where indicated. For experiments using 2 antibodies from the same species, slides were microwaved between incubations with the first secondary and second primary antibodies (5). All samples for a given experiment were processed in parallel using antibody master mixes.

### **Immunoprecipitation and immunoblotting**

For analysis of human AGR2-MUC5AC complexes, A549 lung carcinoma and MG63 osteosarcoma cell lines (ATCC) were lysed in 25 mM Tris-HCl pH 7.4, 150 mM NaCl, 2 mM EDTA, 0.5% Tween20 2 $\times$  mini-Complete protease inhibitor (Roche), 1 mM PMSF (Sigma), and 25 mM N-ethyl maleimide. AGR2 was immunoprecipitated from lysates

with anti-human AGR2 (EPR3278, Epitomics) and Dynabead-protein G slurry (Invitrogen).

For analysis of mucin levels in mouse lung, proteins for mucin immunoblotting were isolated by homogenization of whole lung and proximal airways in 100mM Tris, 5mM EDTA, 6-M guanidine HCl, 2X mini-complete proteinase inhibitor (Roche), 1mM PMSF, and 25mM N-ethyl Maleimide. Lysates were dialyzed against 6-M Urea/Tris/EDTA overnight at 4C, then aliquotted, quantified by nanodrop and BCA, then stored at -20C or -80C. 100ug of lung protein were loaded in each well.

Proteins were separated using non-reducing 0.7% agarose/3% acrylamide gels containing 6 M urea, 50 mM Tris, 40 mM glycine, and 0.35% SDS for electrophoresis. Proteins were transferred to PVDF (Immobilon FL, Millipore), blocked in 5% milk/TBST or 3% BSA/TBST, and incubated in primary antibody followed by HRP-conjugated secondary antibodies or HRP-conjugated streptavidin (Invitrogen). After incubation in 1.25 mM luminol, 200  $\mu$ M p-Coumaric acid, and 0.1% hydrogen peroxide in 100 mM Tris, pH 8.5, luminescence was detected using a FluorchemM imager (ProteinSimple) and densitometry performed using ImageJ (v1.43u, NIH).

### **Quantitative morphometry**

For mucous cell measurements, 5  $\mu$ m vertical sections of paraformaldehyde-fixed, paraffin-embedded *Agr2*<sup>-/-</sup> and *Agr2*<sup>+/+</sup> allergen-challenged mouse lung were deparaffinized and stained with periodic acid-Schiff (PAS) reagent and counterstained with hematoxylin, as previously described. Airway epithelium was delimited under low-power magnification and the Computer Assisted Stereology Toolbox (CAST) grid system (Olympus Denmark, Albertslund, Denmark) was used to randomly survey non-overlapping high-power fields (HPF). The numbers of mucous cells were counted and the volume of stored mucin was measured using the rotator method. A minimum of 25 high-power fields per slide were scored (n=5-6 mice per group). For AGR2

immunofluorescent cell counts, stained cells were identified in Z-stacks of large airway epithelium (trachea to second-generation bronchi) acquired at 100 × magnification (≥ 12 Z stacks/mouse, 3 mice/group). All cell counts were performed by a blinded observer.

### **Airway Epithelial Brushing**

An airway brush made of polyethylene tubing scored with fine grit sandpaper was inserted into an incision between the first and second tracheal rings, and advanced 2 cm into the left and then the right mainstem bronchi. Brushes were immediately immersed in Buffer RLT and RNA was extracted using the RNeasy Micro kit (Qiagen).

## References

- E1. Bara J, Gautier R, Daher N, Zaghouani H, Decaens C. Monoclonal antibodies against oncofetal mucin m1 antigens associated with precancerous colonic mucosae. *Cancer Res* 1986;46(8):3983-3989.
- E2. Bara J, Gautier R, Mouradian P, Decaens C, Daher N. Oncofetal mucin m1 epitope family: Characterization and expression during colonic carcinogenesis. *Int J Cancer* 1991;47(2):304-310.
- E3. Zhu Y, Ehre C, Abdullah LH, Sheehan JK, Roy M, Evans CM, Dickey BF, Davis CW. Munc13-2<sup>-/-</sup> baseline secretion defect reveals source of oligomeric mucins in mouse airways. *J Physiol* 2008;586(7):1977-1992.
- E4. Viegas MS, Martins TC, Seco F, do Carmo A. An improved and cost-effective methodology for the reduction of autofluorescence in direct immunofluorescence studies on formalin-fixed paraffin-embedded tissues. *Eur J Histochem* 2007;51(1):59-66.
- E5. Tornehave D, Hougaard DM, Larsson L. Microwaving for double indirect immunofluorescence with primary antibodies from the same species and for staining of mouse tissues with mouse monoclonal antibodies. *Histochem Cell Biol* 2000;113(1):19-23.
